# Supplementary material for: Are weak or negative clinical recommendations associated with higher geographical variation in utilisation than strong or positive recommendations? Cross-sectional study of 24 healthcare services
Source: BMJ Open. 2021 May 10;11(5):e044090. doi: 10.1136/bmjopen-2020-044090 (PMC8112440; doi:10.1136/bmjopen-2020-044090)
Supplement: Supplementary data [file bmjopen-2020-044090supp003.pdf]

**Additional file 3** Algorithm and criteria for the assessment of the direction of recommendation

| N of authors | Steps                                                                                                                                                                                                                                                                                                                                                                                                                                                                                                                                                      |
|--------------|------------------------------------------------------------------------------------------------------------------------------------------------------------------------------------------------------------------------------------------------------------------------------------------------------------------------------------------------------------------------------------------------------------------------------------------------------------------------------------------------------------------------------------------------------------|
| In duplicate | <ol style="list-style-type: none"><li>1. Once the guideline and the recommendation statement are located (see Additional file 2), classify the recommendation into positive and negative.<ul style="list-style-type: none"><li>- <b>Positive</b> recommendation encourages the use of a health care service in a given population.</li><li>- <b>Negative</b> recommendation discourages the use of a health care service in a given population (e.g., contains negative indicative words, such as <i>not</i>, <i>no</i>, <i>never</i>)</li></ul></li></ol> |
